# Supplementary material for: Engineering of a functional pancreatic acinus with reprogrammed cancer cells by induced PTF1a expression
Source: Royal Society of Chemistry journal article supplement (doi:10.1039/d1lc00350j), 2021-01-01
Supplement: d1lc00350j1.pdf [file d1lc00350j1.pdf]

## Electronic supplementary information

### Engineering of a Functional Pancreatic Acinus with Reprogrammed Cancer Cells by Induced *PTF1a* Expression

Stephanie M. Venis,<sup>a</sup> Hye-ran Moon,<sup>a</sup> Yi Yang,<sup>b</sup> Sagar M. Utturkar,<sup>c</sup> Stephen F. Konieczny,<sup>bc</sup> and Bumsoo Han<sup>\*acd</sup>

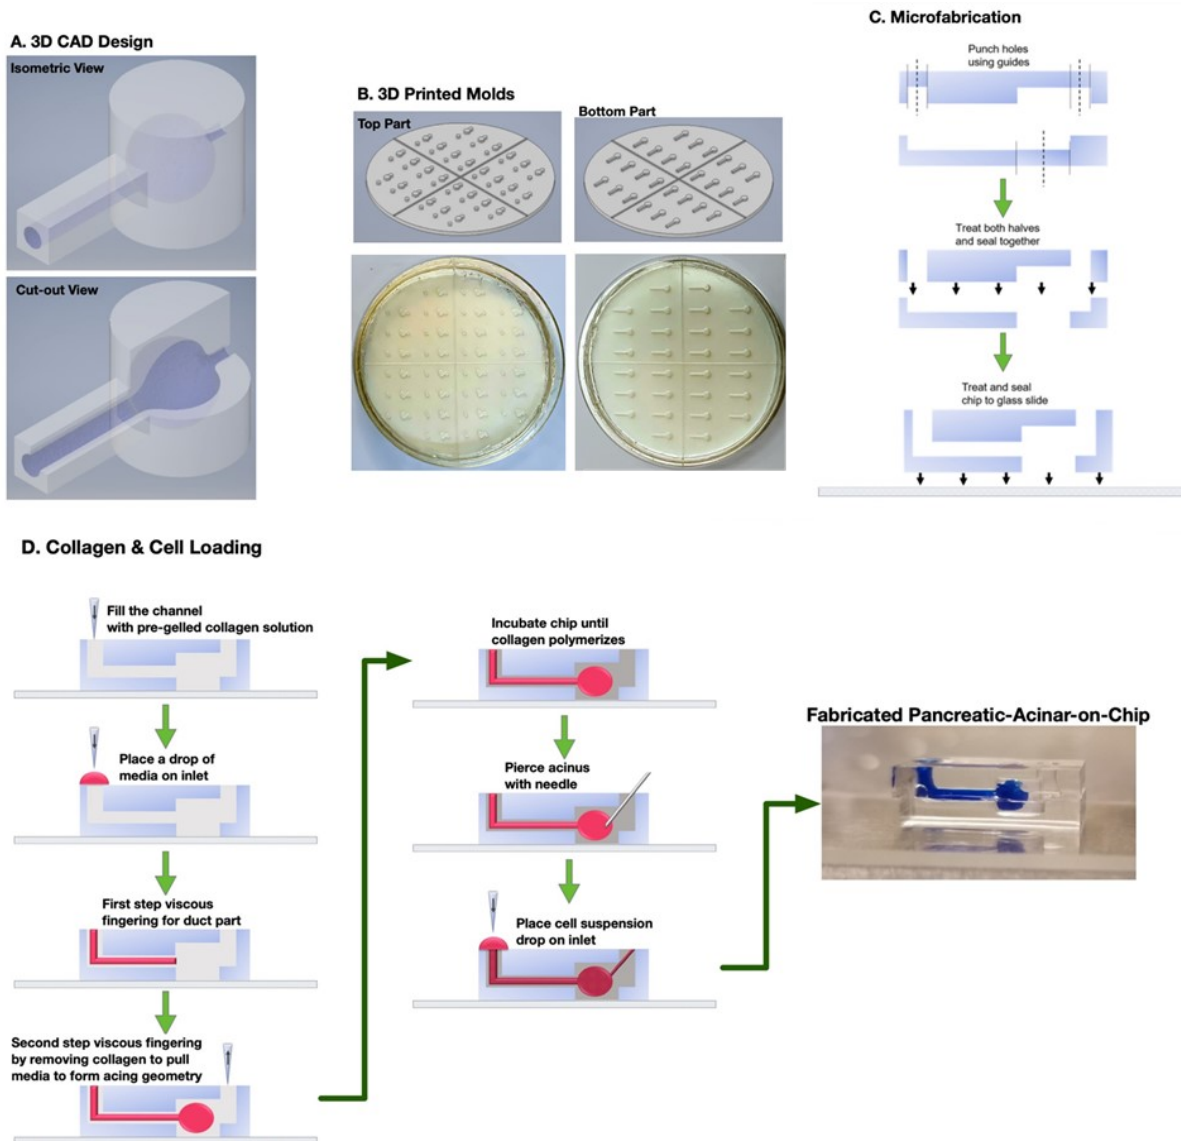

Fig. S1 Design and microfabrication of the pancreatic-acinus-on-chip (PAC) platform.
